# Supplementary material
Source: PubMed Central journal article supplement (PMC2893986)
Supplement: E10-01-0081_1.pdf [file E10-01-0081_1.pdf]

**Supplementary Figure 1.** Expression of  $\beta_1$  subunits in transfected MDCK cells. MDCK cells expressing R $\beta$  YFP were fixed and immunostained using antibodies against the rat (A, B) or dog  $\beta_1$  subunit (C, D) and a Cy5 secondary antibody. (A, C) Representative images of the fluorescence of MR $\beta$  YFP cells recorded at 540-575 nm. (B) Immunodetection of the rat  $\beta_1$  subunit in the same optical section as that in A. Bar: 30  $\mu\text{m}$ . (D) Immunodetection of the dog  $\beta_1$  subunit in the same optical section as that in C. Bar: 10  $\mu\text{m}$ .

**Supplementary Figure 2.** Expression of rat  $\beta_1$  subunits in MDCK cells does not disturb the expression of adherens junction molecules. MDCK WT (A, B) and MR $\beta$  YFP (C, D) cells were fixed and immunostained using a pan-cadherin antibody. (A, C) Representative image of the fluorescence produced by excitation with a 425-500 nm laser line and emission recorded 540-575 nm (according to the YFP spectra). (B, D) Typical image of pan-cadherin immunodetection obtained using Cy5 secondary antibodies detected at 650/670 nm. Bars in B and D are 30 and 20  $\mu\text{m}$ , respectively.

**Supplementary Figure 3.** Representative imaging of the living cells used as controls for the FRET assay. All images were obtained in the same conditions as the  $\beta$ - $\beta$  interaction FRET after acceptor photobleaching assay. (A, D, G) CFP fluorescence following excitation at 390-425 nm and emission at 475-525 nm. (B, E, H) YFP fluorescence following excitation at 425-500 nm and emission at 540-575 nm. (A-C) MDCK cells transfected with a CFP-YFP fusion construct. ROI 3 was the photobleached region (positive control). (D-F) Co-culture of MR $\beta$  CFP and MR $\beta$  YFP cells. ROI 4, a membrane domain in which no YFP expression was visible, was the photobleached region. (G-I) Co-culture of MDCK cells expressing CFP alone (cytoplasmic) and MR $\beta$  YFP cells. ROI 5 represents a photobleached region in which CFP-containing vesicles were close to the membrane of MR $\beta$  YFP. Bars: 15  $\mu\text{m}$ .

MR $\beta$  YFP

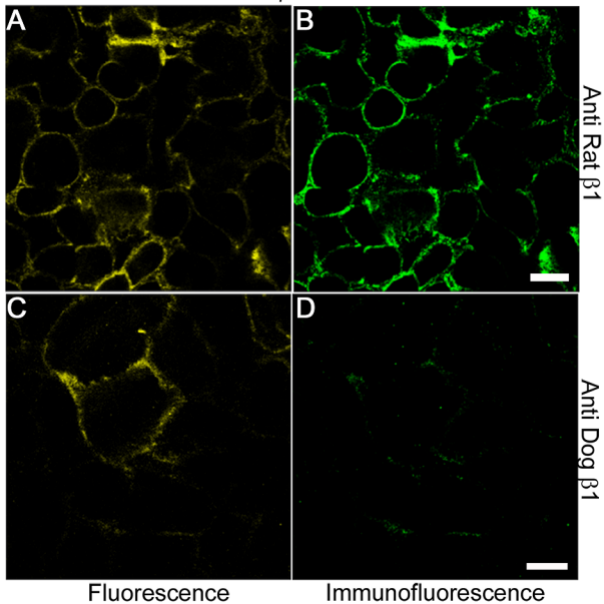

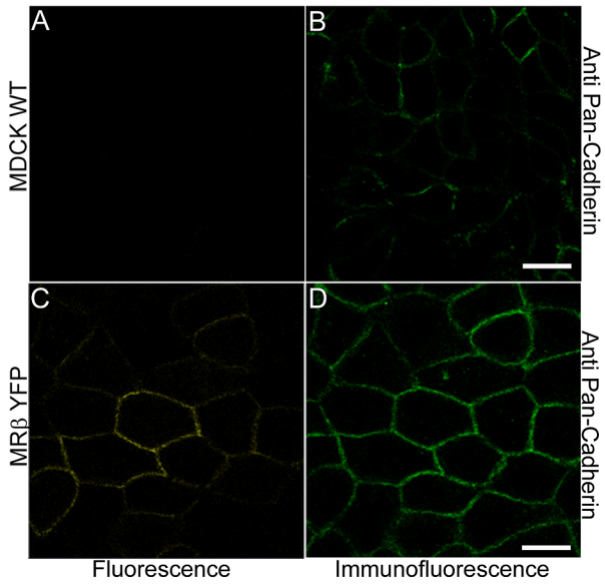

CFP

YFP

Merge

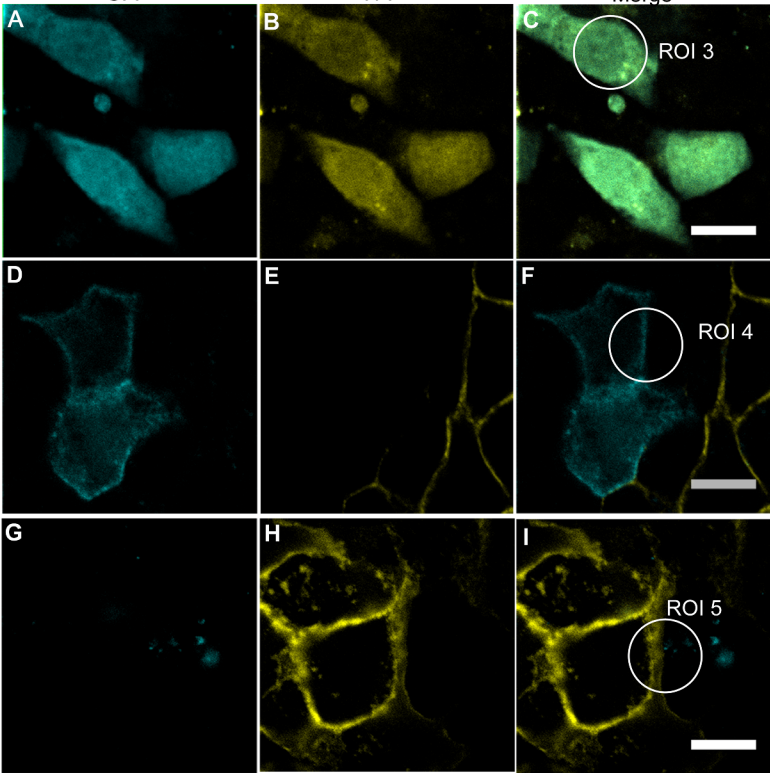

### Supplementary Table 1.

**Table 1. Fluorescence energy transference in living MDCK cells.**

| Interaction             | D <sub>PRE</sub> (%) | D <sub>POST</sub><br>(% of D <sub>PRE</sub> ) | %E<br>E=((D <sub>POST</sub> -D <sub>PRE</sub> )/D <sub>POST</sub> )x100 | N  |
|-------------------------|----------------------|-----------------------------------------------|-------------------------------------------------------------------------|----|
| β-β in live cells ROI 1 | 100                  | 126.6 ± 2.1                                   | 21.3 ± 1.4                                                              | 10 |
| Negative control ROI 2  | 100                  | 101.0 ± 0.9                                   | 0.8 ± 0.6                                                               | 9  |
| Positive control ROI 3  | 100                  | 113.4 ± 1.3                                   | 11.5 ± 1.1                                                              | 10 |
| Negative control ROI 4  | 100                  | 93.5 ± 2.7                                    | 0.0 ± 0.0                                                               | 10 |
| Negative control ROI 5  | 100                  | 95.4 ± 4.0                                    | 0.0 ± 0.0                                                               | 10 |

The efficiency of FRET (%E) was calculated from fluorescence recovery after acceptor photobleaching assays. To evaluate β-β interaction in vivo, fluorescence intensity of CFP was measured before (D<sub>PRE</sub>) and after (D<sub>POST</sub>) bleaching of YFP in area including the lateral membranes of cells expressing β-YFP and contacting neighboring cells expressing a β-CFP (ROI 1, Fig. 5). D<sub>pre</sub> was normalized to 100% in all cases. Positive and negative controls were calculated from ROIs described in the corresponding figures. The negative control (ROI 2) is in Fig.5; the positive control (ROI 3) and additional negative controls (ROI 4 and ROI 5) are in SI Fig 4. Means ± S.E.M are for the number of experiments depicted as N.
